# Supplementary material for: scPred: accurate supervised method for cell-type classification from single-cell RNA-seq data
Source: Genome Biol. 2019 Dec 12;20:264. doi: 10.1186/s13059-019-1862-5 (PMC6907144; doi:10.1186/s13059-019-1862-5)
Supplement: Supplementary file 3 — Additional file 3: Table S4. Prediction results of pancreatic cells without Seurat alignment. Table S6. Prediction results using Baron dataset as reference. Table S7. Classification performance of scmap-cluster using the Baron dataset as training. Table S8. Classification performance of scmap-cell using the Baron dataset as training. Table S9. Classification performance of caSTLe using the Baron dataset as training. Table S10. Classification performance of singleCellNet using the Baron dataset as training. Table S11. Classification performance of scID using the Baron dataset as training. Table S14. Differentially expressed genes between unassigned cells by scPred and remaining cord blood-derived cells. Table S15. Gene ontology overrepresentation results of overexpressed genes from unassigned cells. [file 13059_2019_1862_MOESM3_ESM.xlsx]

## Sheet: Table S4
Table S4: Prediction results of pancreatic cells without Seurat alignment. The accuracy for classifying cells from the islets of Langerhans is reduced for all alpha, beta, delta, and gamma cells. Most of the other cell types were classified correctly regardless of the aligment step.
Baron	alpha	beta	delta	gamma	acinar	activated_stellate	ductal	endothelial	epsilon	macrophage	mast	quiescent_stellate	schwann	t_cell
alpha	0.88	0	0	0	0	0	0	0.01	0	0	0	0.01	0	0
beta	0	0.7	0	0	0.03	0.04	0.09	0.02	0	0	0	0.01	0.15	0
delta	0	0	0.64	0	0	0	0	0	0.22	0	0	0	0	0
gamma	0	0	0	0.43	0.01	0	0	0	0	0	0	0	0	0
unassigned	0.12	0.3	0.36	0.56	0.96	0.95	0.91	0.98	0.78	1	1	0.99	0.85	1

## Sheet: Table S6
Table S6: Prediction results using Baron dataset as reference. Values along the diagonal represent the sensitivities for the target cell-type classes. The average sensitivity and specificity 760 across all three datasets were 0.89 and 0.40 respectively. Contingency tables are also shown for all predictions.
Muraro														Muraro
	alpha	beta	delta	gamma	acinar	ductal	endothelial	epsilon	mesenchymal						alpha	beta	delta	gamma	acinar	ductal	endothelial	epsilon	mesenchymal
alpha	0.99	0.02	0	0.01	0.58	0.54	0	0.33	0.24					alpha	784	9	0	1	72	120	0	1	15
beta	0	0.93	0.02	0	0.02	0	0.05	0	0					beta	2	406	4	0	2	0	1	0	0
delta	0	0	0.91	0	0	0	0.1	0	0					delta	1	0	173	0	0	0	2	0	0
gamma	0	0.01	0	0.92	0	0	0	0	0					gamma	1	5	0	93	0	0	0	0	0
unassigned	0.01	0.04	0.07	0.07	0.41	0.46	0.86	0.67	0.76					unassigned	6	16	14	7	51	101	18	2	48
Segerstolpe														Segerstolpe
	alpha	beta	delta	gamma	acinar	co-expression	ductal	endothelial	epsilon	mast	MHC class II	PSC			alpha	beta	delta	gamma	acinar	co-expression	ductal	endothelial	epsilon	mast	MHC class II	PSC
alpha	0.99	0	0	0.09	0.39	0.27	0.78	0.53	0.43	0.83	0.75	0.77		alpha	781	0	0	18	41	9	264	8	3	5	3	34
beta	0	0.71	0	0	0	0.21	0	0	0	0	0	0		beta	0	172	0	0	0	7	0	0	0	0	0	0
delta	0	0	0.88	0	0	0.03	0.01	0	0	0	0	0		delta	0	0	90	0	0	1	2	0	0	0	0	0
gamma	0	0	0	0.75	0	0	0	0	0	0	0	0		gamma	0	0	0	144	0	0	0	0	0	0	0	0
unassigned	0.01	0.29	0.12	0.16	0.61	0.48	0.21	0.47	0.57	0.17	0.25	0.23		unassigned	5	69	12	30	64	16	72	7	4	1	1	10
Xin														Xin
	alpha	beta	delta	gamma											alpha	beta	delta	gamma
alpha	0.97	0	0.02	0.02										alpha	855	0	1	2
beta	0	0.92	0	0										beta	0	402	0	0
delta	0	0.01	0.93	0										delta	0	4	40	0
gamma	0	0	0	0.82										gamma	0	0	0	67
unassigned	0.03	0.08	0.05	0.16										unassigned	30	33	2	13
All														All
	alpha	beta	delta	gamma	other										alpha	beta	delta	gamma	other
alpha	0.98	0.01	0	0.06	0.58									alpha	2420	9	1	21	575
beta	0	0.88	0.01	0	0.01									beta	2	980	4	0	10
delta	0	0	0.9	0	0.01									delta	1	4	303	0	5
gamma	0	0	0	0.81	0									gamma	1	5	0	304	0
unassigned	0.02	0.11	0.08	0.13	0.4									unassigned	41	118	28	50	395

## Sheet: Table S7
Table S7: Classification performance of scmap-cluster using the Baron dataset as training. Classifier was applied to Muraro, Segerstolpe, and Xin datasets. All gamma cells were labeled as "unassigned"
Muraro														Muraro
	alpha	beta	delta	gamma	acinar	ductal	endothelial	epsilon	mesenchymal						alpha	beta	delta	gamma	acinar	ductal	endothelial	epsilon	mesenchymal
alpha	0.09	0	0	0	0	0.01	0	0	0					alpha	71	0	0	0	0	2	0	0	0
beta	0.16	0.96	0.07	0.05	0.71	0.3	0.76	0	0.94					beta	128	418	14	5	89	66	16	0	59
delta	0	0	0	0	0	0	0	0	0					delta	0	0	0	0	0	0	0	0	0
gamma	0	0	0	0	0	0	0	0	0					gamma	0	0	0	0	0	0	0	0	0
unassigned	0.75	0.04	0.93	0.95	0.29	0.69	0.24	1	0.06					unassigned	595	18	177	96	36	153	5	3	4
Segerstolpe														Segerstolpe
	alpha	beta	delta	gamma	acinar	co-expression	ductal	endothelial	epsilon	mast	MHC class II	PSC			alpha	beta	delta	gamma	acinar	co-expression	ductal	endothelial	epsilon	mast	MHC class II	PSC
alpha	0.89	0	0	0.01	0.19	0	0.44	0	0.43	0	0.75	0.07		alpha	701	0	0	2	20	0	149	0	3	0	3	3
beta	0	0.95	0	0.01	0.07	0.73	0.02	0.13	0	0	0	0.45		beta	2	230	0	1	7	24	8	2	0	0	0	20
delta	0	0	0.02	0	0	0	0	0	0	0	0	0		delta	0	0	2	0	0	0	0	0	0	0	0	0
gamma	0	0	0	0	0	0	0	0	0	0	0	0		gamma	0	0	0	0	0	0	0	0	0	0	0	0
unassigned	0.11	0.05	0.98	0.98	0.74	0.27	0.54	0.87	0.57	1	0.25	0.48		unassigned	83	11	100	189	78	9	181	13	4	6	1	21
Xin														Xin
	alpha	beta	delta	gamma											alpha	beta	delta	gamma
alpha	0.72	0	0	0.02										alpha	636	0	0	2
beta	0	0.88	0	0.02										beta	4	388	0	2
delta	0	0	0.07	0										delta	0	0	3	0
gamma	0	0	0	0										gamma	0	0	0	0
unassigned	0.28	0.12	0.93	0.95										unassigned	245	51	40	78

## Sheet: Table S8
Table S8: Classification performance of scmap-cell using the Baron dataset as training. Classifier was applied to Muraro, Segerstolpe, and Xin datasets. All gamma cells were labeled as "unassigned".
Muraro														Muraro
	alpha	beta	delta	gamma	acinar	ductal	endothelial	epsilon	mesenchymal						alpha	beta	delta	gamma	acinar	ductal	endothelial	epsilon	mesenchymal
alpha	0.66	0	0	0.01	0.08	0.09	0	0.33	0					alpha	528	1	0	1	10	20	0	1	0
beta	0.01	0.91	0.26	0.11	0.26	0.14	0.33	0.33	0.44					beta	5	395	50	11	33	30	7	1	28
delta	0	0	0.03	0	0	0	0	0	0					delta	0	0	6	0	0	1	0	0	0
gamma	0	0	0	0	0	0	0	0	0					gamma	0	0	0	0	0	0	0	0	0
unassigned	0.33	0.09	0.71	0.88	0.66	0.77	0.67	0.33	0.56					unassigned	261	40	135	89	82	170	14	1	35
Segerstolpe														Segerstolpe
	alpha	beta	delta	gamma	acinar	co-expression	ductal	endothelial	epsilon	mast	MHC class II	PSC			alpha	beta	delta	gamma	acinar	co-expression	ductal	endothelial	epsilon	mast	MHC class II	PSC
alpha	0.95	0	0	0.23	0.33	0.12	0.25	0.13	0.71	0.5	0.5	0.16		alpha	743	0	0	44	35	4	86	2	5	3	2	7
beta	0	0.95	0.15	0.03	0.04	0.39	0.02	0.13	0	0	0	0.2		beta	0	228	15	6	4	13	6	2	0	0	0	9
delta	0	0	0.05	0	0	0	0	0	0	0	0	0		delta	0	0	5	0	0	0	0	0	0	0	0	0
gamma	0	0	0	0	0	0	0	0	0	0	0	0		gamma	0	0	0	0	0	0	0	0	0	0	0	0
unassigned	0.05	0.05	0.8	0.74	0.63	0.48	0.73	0.73	0.29	0.5	0.5	0.64		unassigned	43	13	82	142	66	16	246	11	2	3	2	28
Xin														Xin
	alpha	beta	delta	gamma											alpha	beta	delta	gamma
alpha	0.95	0	0.02	0.22										alpha	844	0	1	18
beta	0	0.95	0.12	0.02										beta	0	415	5	2
delta	0	0	0.14	0										delta	0	0	6	0
gamma	0	0	0	0										gamma	0	0	0	0
unassigned	0.05	0.05	0.72	0.76										unassigned	41	24	31	62

## Sheet: Table S9
Table S9: Classification performance of caSTLe using the Baron dataset as training. Classifier was applied to Muraro, Segerstolpe, and Xin datasets. All gamma cells from the Segerstolpe and Xin datasets were labeled incorrectly.
Muraro														Muraro
	alpha	beta	delta	gamma	acinar	ductal	endothelial	epsilon	mesenchymal						alpha	beta	delta	gamma	acinar	ductal	endothelial	epsilon	mesenchymal
alpha	0.83	0.05	0.06	0.13	0.01	0	0	0.33	0					alpha	670	22	11	13	2	0	0	1	0
beta	0	0.61	0.01	0	0	0	0	0	0					beta	0	73	2	0	0	1	0	0	0
delta	0.14	0.27	0.85	0.47	0.01	0.01	0	0.67	0.01					delta	115	20	164	47	3	2	0	2	1
gamma	0	0.02	0.04	0.37	0	0	0	0	0					gamma	0	9	7	37	0	1	0	0	0
unassigned	0.03	0.05	0.05	0.04	0.98	0.98	1	0	0.99					unassigned	27	24	9	4	214	241	21	0	79
Segerstolpe														Segerstolpe
	alpha	beta	delta	gamma	acinar	co-expression	ductal	endothelial	epsilon	mast	MHC class II	PSC			alpha	beta	delta	gamma	acinar	co-expression	ductal	endothelial	epsilon	mast	MHC class II	PSC
alpha	0.56	0.24	0.26	0.15	0	0.31	0.03	0.06	0.14	0.29	0.2	0.02		alpha	499	64	30	30	0	12	10	1	1	2	1	1
beta	0	0.4	0.07	0	0.01	0.21	0.01	0	0	0	0	0		beta	2	107	8	0	2	8	5	0	0	0	0	0
delta	0.01	0	0.02	0.01	0.01	0	0.01	0	0	0	0	0		delta	5	0	2	1	1	0	3	0	0	0	0	0
gamma	0	0	0	0	0.01	0	0.01	0	0	0	0	0		gamma	0	0	0	0	1	0	2	0	0	0	0	0
unassigned	0.43	0.37	0.65	0.84	0.98	0.49	0.95	0.94	0.86	0.71	0.8	0.98		unassigned	380	99	74	166	181	19	366	15	6	5	4	53
Xin														Xin
	alpha	beta	delta	gamma											alpha	beta	delta	gamma
alpha	0.97	0.51	0.71	0.61										alpha	855	239	35	52
beta	0	0.44	0.06	0										beta	1	209	3	0
delta	0	0	0.1	0.01										delta	0	0	5	1
gamma	0	0	0	0										gamma	0	0	0	0
unassigned	0.03	0.05	0.12	0.38										unassigned	30	24	6	32

## Sheet: Table S10
Table S10: Classification performance of singleCellNet using the Baron dataset as training. Classifier was applied to Muraro, Segerstolpe, and Xin datasets
Muraro														Muraro
	alpha	beta	delta	gamma	acinar	ductal	endothelial	epsilon	mesenchymal						alpha	beta	delta	gamma	acinar	ductal	endothelial	epsilon	mesenchymal
alpha	0.79	0.01	0	0	0	0	0	0	0					alpha	638	3	0	0	0	0	0	0	0
beta	0	0.34	0	0	0	0	0	0	0					beta	0	152	0	0	0	1	0	0	0
delta	0	0	0.62	0	0	0	0	0	0					delta	0	0	120	0	0	1	0	0	0
gamma	0	0	0	0.03	0	0	0	0	0					gamma	0	1	0	3	0	0	0	0	0
unassigned	0.21	0.65	0.38	0.97	1	0.99	1	1	1					unassigned	174	292	73	98	219	243	21	3	80
Segerstolpe														Segerstolpe
	alpha	beta	delta	gamma	acinar	co-expression	ductal	endothelial	epsilon	mast	MHC class II	PSC			alpha	beta	delta	gamma	acinar	co-expression	ductal	endothelial	epsilon	mast	MHC class II	PSC
alpha	0.84	0	0	0	0.01	0	0	0.06	0	0	0.2	0		alpha	741	0	0	0	1	0	0	1	0	0	1	0
beta	0	0.77	0	0	0	0.1	0	0	0	0	0	0.02		beta	0	209	0	0	0	4	0	0	0	0	0	1
delta	0	0	0.74	0	0	0	0	0	0	0	0	0		delta	0	0	84	0	0	0	0	0	0	0	0	0
gamma	0	0	0	0.09	0	0	0	0	0	0	0	0		gamma	0	0	0	18	0	0	0	0	0	0	0	0
unassigned	0.16	0.23	0.26	0.91	0.99	0.9	1	0.94	1	1	0.8	0.98		unassigned	145	61	30	179	184	35	386	15	7	7	4	53
Xin														Xin
	alpha	beta	delta	gamma											alpha	beta	delta	gamma
alpha	0.97	0	0	0										alpha	860	0	0	0
beta	0	0.77	0	0										beta	0	362	0	0
delta	0	0	0.43	0										delta	0	0	21	0
gamma	0	0	0	0.06										gamma	0	0	0	5
unassigned	0.03	0.23	0.57	0.94										unassigned	26	110	28	80

## Sheet: Table S11
Table S11: Classification performance of scID using the Baron dataset as training. Classifier was applied to Muraro, Segerstolpe, and Xin datasets
Muraro														Muraro
	alpha	beta	delta	gamma	acinar	ductal	endothelial	epsilon	mesenchymal						alpha	beta	delta	gamma	acinar	ductal	endothelial	epsilon	mesenchymal
alpha	0.98	0.01	0.01	0.02	0.13	0.09	0	0.33	0.09					alpha	795	5	1	2	29	21	0	1	7
beta	0	0.94	0.02	0	0	0.01	0	0	0.05					beta	2	420	4	0	0	2	0	0	4
delta	0	0	0.81	0	0	0	0	0	0					delta	0	0	157	0	0	0	0	0	0
gamma	0.01	0.03	0.16	0.01	0.84	0.87	1	0.67	0.82					gamma	8	15	31	1	185	212	21	2	66
unassigned	0.01	0.02	0	0.97	0.02	0.04	0	0	0.04					unassigned	7	8	0	98	5	10	0	0	3
Segerstolpe														Segerstolpe
	alpha	beta	delta	gamma	acinar	co-expression	ductal	endothelial	epsilon	mast	MHC class II	PSC			alpha	beta	delta	gamma	acinar	co-expression	ductal	endothelial	epsilon	mast	MHC class II	PSC
alpha	0.43	0	0	0	0.03	0.08	0.02	0	0	0	0	0		alpha	378	0	0	0	5	3	8	0	0	0	0	0
beta	0	0.91	0.04	0	0	0.67	0	0	0	0	0	0.02		beta	0	247	4	0	0	26	0	0	0	0	0	1
delta	0	0	0.62	0	0	0	0	0	0	0	0	0		delta	0	0	71	0	0	0	0	0	0	0	0	0
gamma	0	0	0.01	0.96	0.06	0.03	0.05	0.25	0.43	0	0	0.07		gamma	4	0	1	190	11	1	21	4	3	0	0	4
unassigned	0.57	0.09	0.33	0.04	0.91	0.23	0.92	0.75	0.57	1	1	0.91		unassigned	504	23	38	7	169	9	357	12	4	7	5	49
Xin														Xin
	alpha	beta	delta	gamma											alpha	beta	delta	gamma
alpha	1	0	0.02	0.06										alpha	883	0	1	5
beta	0	0.98	0	0										beta	0	463	0	0
delta	0	0	0.94	0										delta	0	0	46	0
gamma	0	0	0	0.94										gamma	0	0	0	80
unassigned	0	0.02	0.04	0										unassigned	3	9	2	0

## Sheet: Table S14
Table S14: Differentially expressed genes between unassigned cells by scPred and remaining cord blood-derived cells. Top upregulated genes include T-cell receptor gamma locus and myeloid770 related genes
id	logFC	logCPM	LR	PValue	pValAdj
X06776	2.83938	7.51685	79.9494	3.84e-19	2.88e-17
TRGC2	2.81544	7.66159	112.278	3.11e-26	4.6e-24
XIST	2.62906	7.70812	189.625	3.84e-43	2.94e-40
SLC22A4	2.48114	7.49872	64.7561	8.48e-16	4.65e-14
PROK2	2.44184	7.52427	79.2049	5.6e-19	4.16e-17
SERPINB10	2.36571	7.84742	72.5243	1.65e-17	1.07e-15
FCGR1A	2.32603	7.62108	65.3452	6.29e-16	3.52e-14
SLC2A5	2.32277	7.61726	59.2847	1.36e-14	6.87e-13
CLEC5A	2.32036	7.48326	72.5397	1.64e-17	1.06e-15
MARC1	2.31129	7.64307	69.0408	9.64e-17	5.74e-15
BC039116	2.30958	7.84651	123.363	1.16e-28	2.27e-26
PIWIL4	2.2269	7.51615	73.1871	1.18e-17	7.75e-16
M64936	2.21394	7.65335	82.7432	9.34e-20	7.32e-18
PRSS57	2.20721	7.91145	84.3737	4.1e-20	3.31e-18
CRYGD	2.16129	7.45372	37.3828	9.71e-10	3.04e-08
TARP	2.14596	8.06726	77.4158	1.39e-18	9.88e-17
AZU1	2.11055	8.29515	111.046	5.78e-26	8.35e-24
FCGR1C	2.09719	7.60571	47.1727	6.5e-12	2.52e-10
SLC1A3	2.06888	7.49131	46.1289	1.11e-11	4.2e-10
MS4A3	2.06884	8.39135	103.627	2.44e-24	3.03e-22
ECRP	2.04632	8.14882	67.7571	1.85e-16	1.06e-14
CLGN	2.04048	7.416	44.4829	2.57e-11	9.42e-10
BV02S1J2.2	-2.00489	7.52893	14.23	0.000161773	0.00185313
TFAP2C	-2.01684	7.48744	39.3975	3.46e-10	1.13e-08
D2HGDH	-2.01887	7.89892	58.0988	2.49e-14	1.22e-12
NNMT	-2.02748	7.48793	31.0622	2.5e-08	6.48e-07
GPC3	-2.03208	7.57461	30.1583	3.98e-08	1.01e-06
MZB1	-2.03598	7.91425	26.9124	2.13e-07	4.77e-06
GDF15	-2.04155	7.49012	31.2125	2.31e-08	6.02e-07
PARD3	-2.04224	7.55149	22.3583	2.26e-06	4.15e-05
KCTD12	-2.05658	8.27381	164.607	1.11e-37	5.17e-35
SLAMF7	-2.05811	7.84142	36.05	1.92e-09	5.79e-08
CD24	-2.05917	7.7565	36.9595	1.21e-09	3.71e-08
SULF2	-2.06525	8.22173	66.8314	2.96e-16	1.68e-14
KIAA0895L	-2.06746	7.75774	36.8394	1.28e-09	3.91e-08
GAGE12J	-2.0689	7.49204	22.9658	1.65e-06	3.13e-05
SPANXB2	-2.07199	7.49363	24.7073	6.67e-07	1.37e-05
BC009735	-2.07434	7.49574	27.3751	1.68e-07	3.83e-06
UPK2	-2.08214	7.49673	28.1814	1.1e-07	2.6e-06
PRSS23	-2.08528	7.49797	37.3001	1.01e-09	3.16e-08
PRAME	-2.09991	7.50071	40.9835	1.54e-10	5.24e-09
CD52	-2.11098	9.02131	230.293	5.15e-52	1.13e-48
X01411	-2.11712	7.54655	20.9959	4.6e-06	7.95e-05
RASD1	-2.13988	7.55815	35.1933	2.99e-09	8.81e-08
CXORF23	-2.14426	7.78865	73.1757	1.19e-17	7.77e-16
RNA5S1	-2.14745	7.69429	24.8822	6.09e-07	1.27e-05
DLK1	-2.15607	7.50793	29.4082	5.86e-08	1.43e-06
BLNK	-2.15668	8.05966	49.0061	2.55e-12	1.03e-10
RAB11B-AS1	-2.15856	7.93579	45.1552	1.82e-11	6.81e-10
GRASP	-2.16574	8.00527	79.1096	5.88e-19	4.35e-17
BCYRN1	-2.17327	9.19097	50.2004	1.39e-12	5.69e-11
BC033997	-2.17843	7.69924	44.4057	2.67e-11	9.78e-10
TNNI2	-2.17975	7.71632	24.7342	6.58e-07	1.36e-05
DMKN	-2.18602	7.51437	29.8389	4.69e-08	1.17e-06
ABI3	-2.18767	7.92873	57.7688	2.95e-14	1.44e-12
FCER1A	-2.19935	8.94237	137.494	9.4e-32	2.55e-29
TGFB1	-2.20168	7.64877	41.1785	1.39e-10	4.76e-09
TGFBI	-2.21777	8.31573	65.2144	6.72e-16	3.72e-14
AGPAT9	-2.23037	7.75135	41.6664	1.08e-10	3.74e-09
MGP	-2.24188	7.52268	29.1827	6.59e-08	1.6e-06
FXYD3	-2.24357	7.52349	38.5443	5.35e-10	1.73e-08
LY96	-2.24491	8.28964	45.0186	1.95e-11	7.27e-10
XAGE1D	-2.24603	7.52402	30.1619	3.97e-08	1e-06
ZNF682	-2.26198	8.05882	92.3884	7.12e-22	6.54e-20
ARL4C	-2.26384	8.28876	130.703	2.88e-30	6.33e-28
IRF4	-2.26994	7.90271	84.8983	3.14e-20	2.59e-18
AK295695	-2.27147	8.80566	224.749	8.33e-51	1.33e-47
SERPINE2	-2.27517	7.64839	36.9259	1.23e-09	3.76e-08
36951	-2.28358	7.86848	51.7304	6.37e-13	2.69e-11
INS-IGF2	-2.30642	7.54034	68.942	1.01e-16	5.97e-15
LGMN	-2.31581	8.10328	69.3553	8.22e-17	4.94e-15
AX747064	-2.34225	7.54326	48.2225	3.8e-12	1.51e-10
TNFRSF12A	-2.34533	7.54314	43.8793	3.49e-11	1.27e-09
AMICA1	-2.35035	8.63273	167.871	2.16e-38	1.09e-35
CLEC4A	-2.35725	8.69236	120.498	4.92e-28	8.85e-26
COL6A1	-2.37646	7.54927	48.5192	3.27e-12	1.3e-10
KCTD15	-2.37842	7.80048	73.4173	1.05e-17	6.92e-16
U00939	-2.38769	8.08838	56.1195	6.82e-14	3.19e-12
SLC18B1	-2.39308	7.81691	42.3224	7.74e-11	2.72e-09
FAM25A	-2.39552	7.55259	41.9549	9.34e-11	3.25e-09
DL491012	-2.41476	9.15521	244.03	5.2e-55	1.53e-51
CNN3	-2.41809	7.70855	41.6988	1.06e-10	3.69e-09
AK056135	-2.41909	7.55546	33.0565	8.95e-09	2.48e-07
NUPR1	-2.4247	7.55896	43.1561	5.05e-11	1.82e-09
SPP1	-2.43859	7.5606	38.3481	5.92e-10	1.9e-08
CLEC10A	-2.43945	8.04222	56.1881	6.59e-14	3.09e-12
JX944780	-2.44751	8.15531	55.8677	7.75e-14	3.59e-12
TMSB15A	-2.45064	7.56237	31.6496	1.85e-08	4.85e-07
TM4SF1	-2.4533	7.57842	40.406	2.06e-10	6.93e-09
CKB	-2.47173	7.67872	39.9482	2.61e-10	8.57e-09
CCL2	-2.48	7.56792	37.9457	7.27e-10	2.33e-08
CGA	-2.48958	7.67422	30.5853	3.2e-08	8.19e-07
EIF1AY	-2.49244	8.10344	60.2528	8.34e-15	4.26e-13
IGFBP3	-2.49982	7.57342	52.7421	3.8e-13	1.65e-11
KRT19	-2.51236	7.57644	51.81	6.11e-13	2.6e-11
IGKAPPA	-2.51495	7.79963	44.6244	2.39e-11	8.82e-10
C19ORF33	-2.52136	7.62048	37.1971	1.07e-09	3.31e-08
APOC3	-2.52329	7.57677	40.9079	1.6e-10	5.44e-09
IFITM1	-2.52948	8.43839	74.9298	4.88e-18	3.32e-16
TTR	-2.53724	7.57985	40.0743	2.44e-10	8.08e-09
BC068609	-2.55368	7.70124	59.6504	1.13e-14	5.74e-13
RPS4Y1	-2.56219	8.84794	200.986	1.27e-45	1.4e-42
MT1E	-2.5715	7.68007	34.2177	4.93e-09	1.4e-07
SNAR-C4	-2.5774	7.58802	42.1345	8.52e-11	2.98e-09
FN1	-2.58322	7.74868	63.0522	2.01e-15	1.06e-13
CLIC2	-2.60376	7.92798	55.5559	9.08e-14	4.18e-12
GAL	-2.62933	7.69621	36.2815	1.71e-09	5.16e-08
PPARGC1A	-2.63049	7.83757	78.8778	6.61e-19	4.83e-17
DSCAM-AS1	-2.65791	7.78893	69.95	6.08e-17	3.73e-15
IGFBP1	-2.66321	7.60803	53.6811	2.36e-13	1.05e-11
VTRNA1-1	-2.66526	7.82581	39.8763	2.71e-10	8.88e-09
KRT8	-2.67743	8.04412	74.9804	4.75e-18	3.25e-16
TMEM27	-2.71999	7.6219	55.7735	8.13e-14	3.76e-12
APOH	-2.72413	7.64448	42.5533	6.88e-11	2.44e-09
ID3	-2.72809	7.67276	56.5776	5.4e-14	2.57e-12
TRNA_VAL	-2.73552	7.78606	38.7181	4.9e-10	1.59e-08
GAGE2C	-2.74327	7.62615	45.6062	1.45e-11	5.42e-10
EGR1	-2.74672	7.8672	70.0478	5.79e-17	3.57e-15
SPANXE	-2.75585	7.62801	42.8449	5.93e-11	2.12e-09
APOC1	-2.76896	8.14298	54.0957	1.91e-13	8.54e-12
HBG2	-2.7693	8.4862	102.215	4.98e-24	5.7e-22
PHLDA2	-2.76995	7.63311	56.2729	6.31e-14	2.97e-12
CCL20	-2.77028	7.6325	43.979	3.32e-11	1.21e-09
TFF3	-2.77563	7.63344	55.228	1.07e-13	4.89e-12
RMRP	-2.7947	7.63713	46.8835	7.53e-12	2.89e-10
UPK3A	-2.87891	8.11098	90.7866	1.6e-21	1.45e-19
CD2	-2.90476	8.22191	122.341	1.94e-28	3.64e-26
GAGE12G	-2.91133	7.78769	46.3151	1.01e-11	3.83e-10
PMEL	-2.96137	7.68266	84.7009	3.47e-20	2.83e-18
CAV1	-2.96954	7.72869	66.5404	3.43e-16	1.94e-14
KRT18	-3.04729	8.06484	88.837	4.29e-21	3.76e-19
IGJ	-3.08161	8.29519	95.7643	1.29e-22	1.29e-20
UTS2	-3.09707	7.98125	58.4028	2.14e-14	1.06e-12
PPP1R14A	-3.12191	8.0584	101.232	8.18e-24	9.24e-22
HAMP	-3.13224	7.83586	63.1079	1.96e-15	1.03e-13
MDK	-3.15897	7.79953	64.3588	1.04e-15	5.64e-14
CD3D	-3.21849	7.75167	64.6947	8.74e-16	4.78e-14
AHSG	-3.2395	7.76064	95.1121	1.8e-22	1.76e-20
ALB	-3.24979	7.76257	86.1004	1.71e-20	1.43e-18
APOA1	-3.30354	8.00545	80.2986	3.22e-19	2.46e-17
LOC645638	-3.35435	8.11199	98.8476	2.73e-23	2.88e-21
NTS	-3.37585	7.80071	72.8494	1.4e-17	9.13e-16
AK311350	-3.42613	7.94908	128.972	6.88e-30	1.48e-27
HBG1	-3.4419	8.64857	128.457	8.92e-30	1.85e-27
GAGE7	-3.44379	7.92451	63.4193	1.67e-15	8.92e-14
ABPARTS	-3.48938	7.92816	173.611	1.2e-39	6.84e-37
FABP1	-3.49426	7.84018	78.9553	6.35e-19	4.68e-17
PRSS1	-3.56489	7.86541	82.9543	8.4e-20	6.63e-18
SNAR-A3	-3.67734	7.90731	117.918	1.81e-27	3.09e-25
HES1	-3.7799	8.12236	162.461	3.28e-37	1.44e-34
SNAR-B2	-3.86644	7.98031	128.816	7.44e-30	1.58e-27
SNAR-C3	-3.9564	8.01729	140.293	2.3e-32	6.74e-30
IGLL5	-4.01982	8.04852	187.629	1.05e-42	7.68e-40
HBZ	-4.04996	8.05638	141.368	1.34e-32	4.02e-30
PRSS2	-4.18147	8.14574	137.694	8.5e-32	2.38e-29
DCT	-4.31998	8.18438	218.047	2.41e-49	3.27e-46
HBE1	-4.44721	8.24377	194.947	2.65e-44	2.33e-41
TFF1	-4.92867	8.50492	231.39	2.97e-52	7.46e-49
APOA2	-5.0296	8.69158	227.172	2.47e-51	4.35e-48

## Sheet: Table S15
Table S15: Gene ontology overrepresentation results of overexpressed genes from unassigned cells. A Fisher’s exact with FDR multiple test correction. Biological processes involving myeloid and neuthophiles were overrepresented. X06776, XIST, BC039116, M64936, TARP, FCGR1C, and 775 ECRP gene identifiers did not map the query database
Analysis Type:	PANTHER Overrepresentation Test (Released 20171205)
Annotation Version and Release Date:	GO Ontology database Released 2018-06-01
Analyzed List:	upload_1 (Homo sapiens)
Reference List:	Homo sapiens (all genes in database)
Test Type:	FISHER
GO biological process complete	Homo sapiens - REFLIST (21042)	upload_1 (15)	upload_1 (expected)	upload_1 (over/under)	upload_1 (fold Enrichment)	upload_1 (raw P-value)	upload_1 (FDR)
myeloid cell activation involved in immune response (GO:0002275)	517	5	0.37	+	13.57	2.25e-05	0.039
myeloid leukocyte mediated immunity (GO:0002444)	515	5	0.37	+	13.62	2.2e-05	0.043
leukocyte degranulation (GO:0043299)	505	5	0.36	+	13.89	2.01e-05	0.0448
granulocyte activation (GO:0036230)	500	5	0.36	+	14.03	1.91e-05	0.0498
myeloid leukocyte activation (GO:0002274)	568	5	0.4	+	12.35	3.51e-05	0.0499
secretion by cell (GO:0032940)	971	6	0.69	+	8.67	3.43e-05	0.0535
neutrophil activation (GO:0042119)	495	5	0.35	+	14.17	1.82e-05	0.057
secretion (GO:0046903)	1084	7	0.77	+	9.06	4.38e-06	0.0685
neutrophil mediated immunity (GO:0002446)	494	5	0.35	+	14.2	1.81e-05	0.0706
neutrophil activation involved in immune response (GO:0002283)	487	5	0.35	+	14.4	1.69e-05	0.0879
neutrophil degranulation (GO:0043312)	483	5	0.34	+	14.52	1.62e-05	0.127
